# Supplementary material
Source: Springer Nature journal article supplement (https://www.springermedizin.de/resource/supplementary/12950_2007_61_MOESM1_ESM.pdf/9557876)

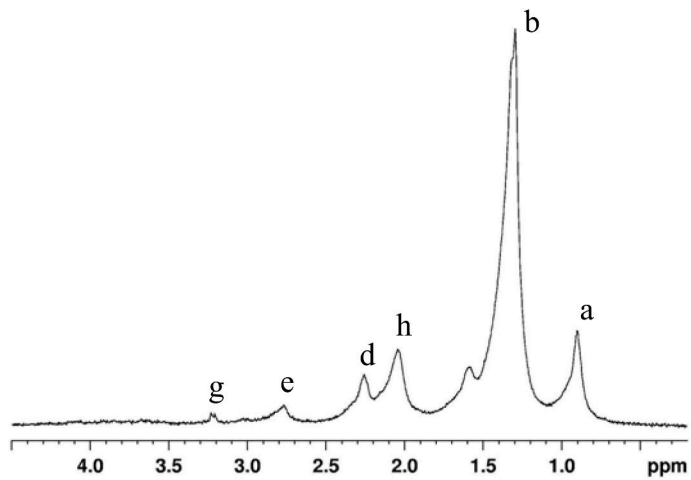

(i)

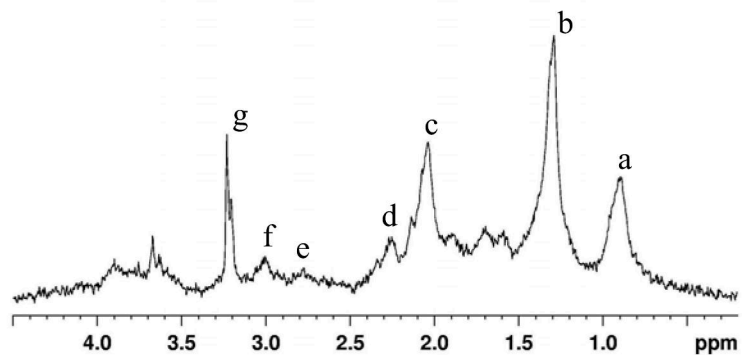

(ii)

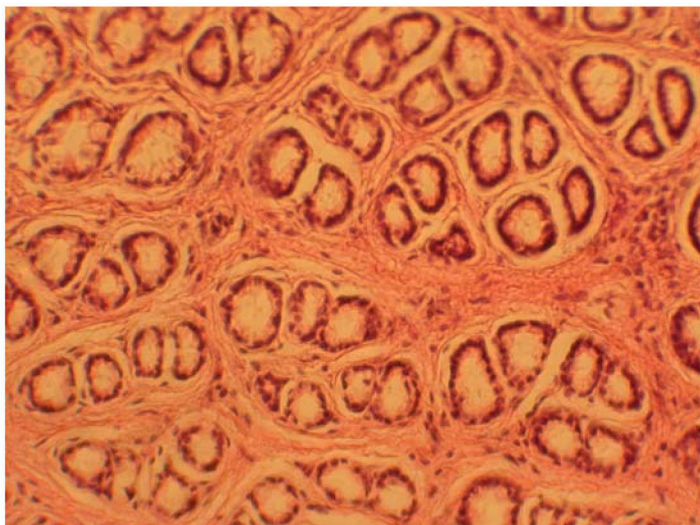

(iii)

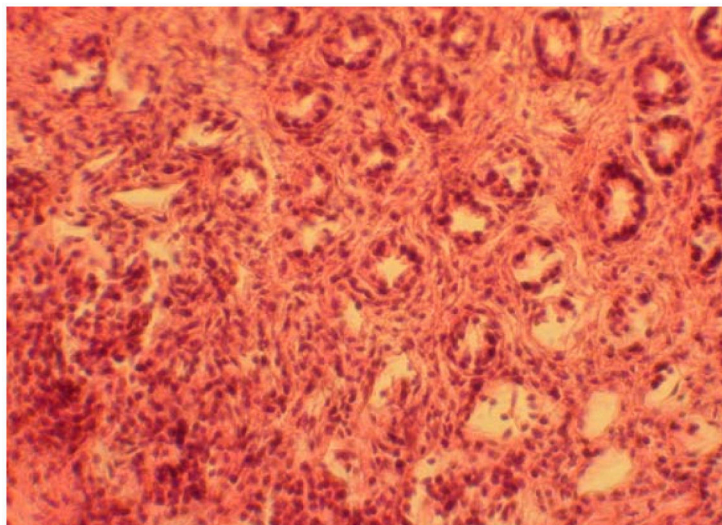

(iv)

Supplement: MOESM1 [file 9557876]
